# Supplementary material
Source: PubMed Central journal article supplement (PMC4401621)
Supplement: NIHMS651743-supplement-Supp_Material.pdf [file NIHMS651743-supplement-Supp_Material.pdf]

SUPPLEMENTARY INFORMATION FOR:

**A Combined Light Sheet Fluorescence and Differential Interference Contrast  
Microscope for Live Imaging of Multicellular Specimens**

R. Baker *et al.*

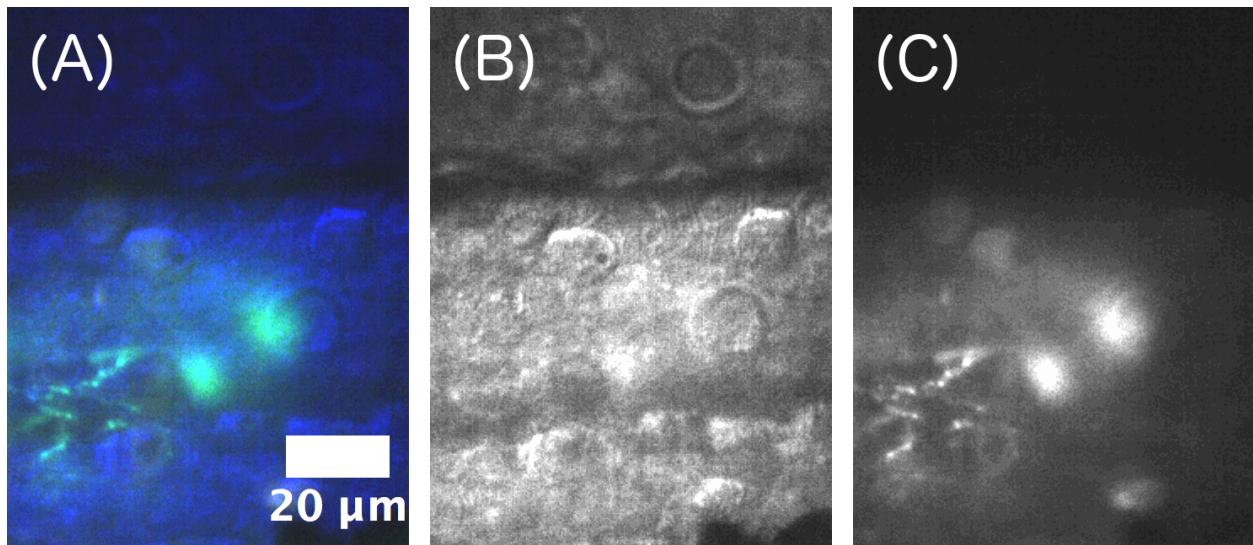

**Supplementary Figure 1.** (A) Simultaneously acquired DICM (blue) and LSFM (green) image of a transgenic (PHOX2B:GFP) larval zebrafish gut with GFP-expressing enteric neurons. (B) and (C) are the blue and green channels, respectively.

**Supplementary Video Captions**

*Supplementary Video 1.* DICM movie of *Vibrio cholerae* in a 6 dpf larval zebrafish. Actual duration: 5 seconds (100 frames per second).

*Supplementary Video 2.* DICM movie of motile neutrophils in a 5 dpf larval zebrafish. Actual duration: 228 seconds (2 frames per second).

*Supplementary Video 3.* DICM movie of a peristaltic wave in a 7 dpf larval zebrafish intestine. Actual duration: 11 seconds (5 frames per second).

*Supplementary Video 4.* Three dimension reconstruction of the enteric nervous system of a 5 dpf PHOX2B:GFP transgenic larval zebrafish. Rendering was done using FluoRender on a series of scanned LSM images (FlouRender is software funded by the NIH: Fluorender: An Imaging Tool for Visualization and Analysis of Confocal Data as Applied to Zebrafish Research, R01-GM098151-01).
